# Supplementary material for: Effects of Low-Frequency Electromagnetic Field on the Physicochemical Properties of Freeze–Thawed Mongolian Cheese
Source: MDPI journal article supplement (doi:10.3390/foods12081567), 2023-04-07
Supplement: s1 [file s1]

**Supplementary Materials:** The following supporting information can be downloaded at: [www.mdpi.com/xxx/s1](http://www.mdpi.com/xxx/s1),

Table S1: Sensory Scoring Criteria; Table S2: Free amino acid in Mongolian cheese on 0, 7th and 14th day; Table S3. Free fatty acid in Mongolian cheese. Table S4. Parameters in regression equation of rheological properties

**Table S1. Sensory Scoring Criteria**

| <b>Sensory terms</b>           | <b>Definition</b>                                        | <b>Scores</b> |
|--------------------------------|----------------------------------------------------------|---------------|
| Appearance<br>(20 points)      | Uniform glossy Milky white                               | $\geq 15$     |
|                                | Uniform Milky white                                      | 9~14          |
| Smell<br>(20 points)           | Lusterless light grey color                              | $\leq 8$      |
|                                | Strong milk flavor with normal light fermentation sour   | $\geq 15$     |
|                                | Mild milk flavor with sour                               | 9~14          |
|                                | Light milk flavor or no flavor with pungent sour or odor | $\leq 8$      |
| Taste<br>(25 points)           | Strong milk flavor with normal light fermentation sour   | $\geq 20$     |
|                                | Light milk flavor with obvious sour                      | 10~19         |
|                                | No milk flavor, bitter and over sour                     | $\leq 9$      |
| Sensory texture<br>(35 points) | Uniform smooth texture, semi-soft and elastic            | $\geq 30$     |
|                                | Basically uniform texture, slightly hard, finer tissue   | 11~29         |
|                                | Rough texture, hard, fragile                             | $\leq 10$     |

**Table S2.** Free amino acid in Mongolian cheese on 0, 7<sup>th</sup> and 14<sup>th</sup> day.

| Groups | Asp  | Thr  | Ser  | Glu  | Gly | Ala | Cys | Val  | Met | Ile  | Leu  | Tyr  | Phe  | Lys  | NH <sub>3</sub> | His | Arg  | Pro | Total<br>(ng/g) |
|--------|------|------|------|------|-----|-----|-----|------|-----|------|------|------|------|------|-----------------|-----|------|-----|-----------------|
| E-E-0  | 1886 | 1065 | 1285 | 6364 | 559 | 870 | 41  | 1880 | 603 | 1348 | 2861 | 1491 | 1344 | 2204 | 446             | 792 | 1036 | 796 | 26871           |
| E-N-0  | 1933 | 1072 | 1331 | 6532 | 549 | 865 | 45  | 1867 | 597 | 1335 | 2852 | 1574 | 1395 | 2200 | 491             | 776 | 1038 | 774 | 27225           |
| E-M-0  | 1915 | 1098 | 1461 | 6862 | 497 | 883 | 45  | 1841 | 562 | 1320 | 2844 | 1580 | 1414 | 2196 | 477             | 774 | 1032 | 783 | 27585           |
| N-E-0  | 2027 | 1131 | 1511 | 7196 | 518 | 926 | 49  | 1915 | 556 | 1361 | 2968 | 1616 | 1480 | 2278 | 496             | 803 | 1069 | 817 | 28714           |
| N-N-0  | 2026 | 1115 | 1475 | 7120 | 514 | 915 | 58  | 1928 | 576 | 1375 | 2971 | 1623 | 1476 | 2279 | 500             | 807 | 1070 | 808 | 28635           |
| N-M-0  | 2041 | 1137 | 1501 | 7085 | 518 | 919 | 60  | 1914 | 565 | 1369 | 2951 | 1612 | 1463 | 2262 | 494             | 801 | 1064 | 822 | 28577           |
| CK-0   | 1899 | 1078 | 1310 | 6464 | 568 | 865 | 34  | 1880 | 604 | 1347 | 2858 | 1532 | 1376 | 2187 | 489             | 780 | 1022 | 795 | 27088           |
| E-E-7  | 1959 | 1122 | 1393 | 6638 | 500 | 888 | 67  | 1898 | 672 | 1363 | 2904 | 1593 | 1400 | 2227 | 489             | 792 | 1048 | 787 | 27739           |
| E-N-7  | 1938 | 1115 | 1469 | 6879 | 506 | 899 | 77  | 1865 | 623 | 1335 | 2884 | 1602 | 1423 | 2208 | 476             | 783 | 1043 | 800 | 27925           |
| E-M-7  | 1989 | 1130 | 1483 | 7232 | 512 | 932 | 40  | 1878 | 551 | 1376 | 2709 | 1856 | 1482 | 2249 | 424             | 807 | 1090 | 739 | 28479           |
| N-E-7  | 1973 | 1121 | 1446 | 7169 | 503 | 919 | 37  | 1851 | 516 | 1350 | 2687 | 1824 | 1476 | 2227 | 419             | 795 | 1069 | 727 | 28109           |
| N-N-7  | 2037 | 1158 | 1486 | 7388 | 516 | 947 | 43  | 1916 | 577 | 1407 | 2768 | 1882 | 1515 | 2300 | 427             | 824 | 1108 | 744 | 29042           |
| N-M-7  | 2012 | 1137 | 1474 | 7321 | 508 | 931 | 39  | 1890 | 517 | 1382 | 2749 | 1872 | 1511 | 2279 | 426             | 813 | 1103 | 735 | 28702           |
| CK-7   | 2057 | 1155 | 1476 | 7176 | 521 | 944 | 36  | 1917 | 534 | 1424 | 2759 | 1859 | 1503 | 2289 | 430             | 826 | 1093 | 754 | 28755           |
| E-E-14 | 1886 | 1083 | 1265 | 6508 | 497 | 924 | 48  | 1982 | 611 | 1380 | 2750 | 1754 | 1367 | 2201 | 426             | 799 | 1049 | 753 | 27281           |
| E-N-14 | 1964 | 1140 | 1376 | 6920 | 511 | 922 | 81  | 1915 | 634 | 1414 | 2724 | 1817 | 1432 | 2251 | 425             | 819 | 1073 | 743 | 28161           |
| E-M-14 | 2005 | 1146 | 1439 | 6964 | 511 | 922 | 46  | 2020 | 561 | 1416 | 2717 | 1815 | 1464 | 2248 | 424             | 812 | 1070 | 739 | 28321           |
| N-E-14 | 2065 | 1221 | 1460 | 7140 | 550 | 958 | 27  | 2028 | 587 | 1494 | 2911 | 1863 | 1484 | 2411 | 448             | 839 | 1152 | 766 | 29405           |
| N-N-14 | 2033 | 1214 | 1449 | 7165 | 546 | 953 | 24  | 2003 | 584 | 1476 | 2868 | 1830 | 1461 | 2370 | 442             | 827 | 1129 | 759 | 29132           |
| N-M-14 | 2035 | 1171 | 1458 | 7149 | 527 | 949 | 55  | 1945 | 653 | 1441 | 2782 | 1894 | 1490 | 2305 | 428             | 833 | 1114 | 762 | 28993           |
| CK-14  | 2036 | 1170 | 1398 | 7126 | 532 | 949 | 112 | 2068 | 643 | 1454 | 2817 | 1851 | 1475 | 2333 | 436             | 845 | 1110 | 769 | 29125           |

**Table S3.** Free fatty acid in Mongolian cheese

| Groups   | E-E0 | E-N0 | E-M0 | N-E0 | N-N0 | N-M0 | CK0 | E-E7 | E-N7 | E-M7 | N-E7 | N-N7 | N-M7 | CK7 | E-E14 | E-N14 | E-M14 | N-E14 | N-N14 | N-M14 | CK14 |
|----------|------|------|------|------|------|------|-----|------|------|------|------|------|------|-----|-------|-------|-------|-------|-------|-------|------|
| C6:0     | 52   | 56   | 60   | 57   | 74   | 56   | 71  | 87   | 75   | 86   | 85   | 78   | 92   | 96  | 64    | 63    | 78    | 70    | 93    | 91    | 152  |
| C8:0     | 73   | 54   | 52   | 54   | 64   | 54   | 58  | 67   | 60   | 67   | 67   | 63   | 67   | 71  | 56    | 61    | 63    | 63    | 73    | 71    | 101  |
| C10:0    | 150  | 109  | 105  | 111  | 128  | 110  | 118 | 139  | 123  | 140  | 136  | 124  | 135  | 145 | 122   | 123   | 124   | 130   | 150   | 144   | 210  |
| C11:0    | 69   | 72   | 48   | 69   | 68   | 64   | 60  | 74   | 70   | 68   | 72   | 74   | 68   | 61  | 78    | 75    | 74    | 42    | 69    | 52    | 99   |
| C12:0    | 147  | 106  | 105  | 108  | 122  | 108  | 105 | 133  | 119  | 136  | 130  | 119  | 131  | 141 | 124   | 121   | 119   | 127   | 147   | 141   | 204  |
| C13:0    | 14   | 12   | 13   | 13   | 14   | 13   | 15  | 14   | 12   | 15   | 13   | 14   | 14   | 15  | 7     | 13    | 7     | 14    | 14    | 14    | 18   |
| C14:0    | 262  | 189  | 193  | 206  | 256  | 251  | 173 | 326  | 290  | 334  | 319  | 125  | 319  | 379 | 189   | 157   | 125   | 219   | 262   | 250   | 349  |
| C14:1    | 32   | 25   | 26   | 28   | 35   | 34   | 42  | 40   | 36   | 41   | 39   | 15   | 40   | 44  | 23    | 19    | 15    | 27    | 32    | 30    | 37   |
| C15:0    | 67   | 48   | 50   | 48   | 54   | 50   | 52  | 60   | 55   | 61   | 58   | 53   | 60   | 67  | 56    | 54    | 53    | 57    | 67    | 64    | 89   |
| C16:0    | 843  | 586  | 580  | 589  | 663  | 641  | 570 | 705  | 658  | 775  | 733  | 648  | 738  | 817 | 690   | 644   | 648   | 712   | 843   | 811   | 1178 |
| C16:1    | 110  | 80   | 81   | 84   | 96   | 90   | 75  | 98   | 92   | 100  | 99   | 100  | 105  | 113 | 94    | 101   | 100   | 95    | 110   | 109   | 147  |
| C17:0    | 58   | 44   | 44   | 44   | 46   | 46   | 43  | 50   | 53   | 55   | 52   | 54   | 55   | 256 | 51    | 47    | 48    | 52    | 58    | 58    | 80   |
| C17:1    | 6    | 6    | 11   | 12   | 14   | 7    | 6   | 16   | 6    | 15   | 17   | 8    | 16   | 20  | 7     | 6     | 8     | 7     | 6     | 6     | 7    |
| C18:0    | 386  | 270  | 274  | 272  | 292  | 294  | 254 | 323  | 300  | 367  | 336  | 305  | 332  | 391 | 312   | 285   | 305   | 326   | 386   | 367   | 524  |
| C18:1n9t | 19   | 15   | 9    | 8    | 41   | 78   | 11  | 72   | 43   | 91   | 47   | 11   | 56   | 64  | 18    | 17    | 11    | 14    | 19    | 20    | 14   |
| C18:1n9c | 34   | 26   | 26   | 28   | 29   | 37   | 32  | 35   | 27   | 30   | 29   | 15   | 35   | 39  | 31    | 26    | 15    | 33    | 34    | 33    | 47   |
| C18:2n6t | 14   | 11   | 12   | 12   | 12   | 12   | 12  | 14   | 13   | 13   | 13   | 12   | 14   | 14  | 14    | 12    | 12    | 13    | 14    | 14    | 19   |
| C18:2n6c | 206  | 144  | 151  | 144  | 155  | 153  | 141 | 174  | 161  | 176  | 182  | 186  | 196  | 221 | 167   | 186   | 206   | 216   | 206   | 216   | 246  |
| C20:0    | 9    | 8    | 6    | 8    | 5    | 8    | 8   | 8    | 8    | 9    | 9    | 9    | 9    | 9   | 8     | 8     | 9     | 9     | 9     | 9     | 9    |
| C18:3n6  | 26   | 18   | 30   | 27   | 30   | 6    | 22  | 8    | 30   | 7    | 6    | 7    | 25   | 32  | 28    | 31    | 7     | 7     | 26    | 28    | 10   |
| C18:3n3  | 28   | 22   | 22   | 22   | 22   | 22   | 26  | 24   | 23   | 27   | 24   | 23   | 25   | 31  | 30    | 22    | 23    | 25    | 28    | 27    | 38   |
| C20:1n9  | 12   | 11   | 10   | 10   | 10   | 9    | 9   | 9    | 7    | 9    | 9    | 8    | 9    | 11  | 10    | 8     | 8     | 9     | 12    | 9     | 13   |
| C21:0    | 3    | 3    | 3    | 3    | 3    | 3    | 3   | 3    | 3    | 3    | 3    | 3    | 3    | 3   | 3     | 3     | 3     | 3     | 3     | 3     | 4    |
| C20:2    | 5    | 2    | 2    | 3    | 3    | 2    | 4   | 5    | 3    | 3    | 1    | 1    | 1    | 2   | 2     | 4     | 1     | 3     | 5     | 3     | 1    |
| C22:0    | 5    | 6    | 6    | 6    | 6    | 6    | 6   | 6    | 6    | 6    | 5    | 4    | 6    | 6   | 4     | 6     | 4     | 5     | 5     | 7     | 7    |
| C20:3n6  | 6    | 8    | 4    | 3    | 11   | 5    | 6   | 13   | 8    | 6    | 13   | 9    | 6    | 16  | 5     | 11    | 9     | 9     | 6     | 6     | 8    |
| C20:3n3  | 17   | 15   | 14   | 15   | 16   | 3    | 15  | 16   | 15   | 18   | 15   | 15   | 16   | 3   | 17    | 16    | 15    | 17    | 17    | 19    | 23   |
| C22:1n9  | 6    | 7    | 7    | 7    | 6    | 6    | 6   | 6    | 6    | 6    | 6    | 7    | 6    | 6   | 7     | 6     | 7     | 5     | 6     | 5     | 5    |
| C23:0    | 6    | 6    | 5    | 4    | 6    | 6    | 5   | 6    | 6    | 6    | 6    | 6    | 5    | 7   | 6     | 4     | 6     | 6     | 6     | 5     | 7    |
| C22:2    | 5    | 4    | 4    | 4    | 4    | 5    | 5   | 5    | 5    | 5    | 5    | 5    | 5    | 5   | 4     | 4     | 5     | 5     | 5     | 4     | 4    |
| C20:5n3  | 6    | 6    | 6    | 6    | 6    | 7    | 8   | 6    | 7    | 7    | 5    | 7    | 8    | 6   | 7     | 10    | 7     | 5     | 6     | 11    | 9    |
| C24:0    | 6    | 5    | 5    | 6    | 5    | 5    | 5   | 5    | 6    | 6    | 5    | 7    | 6    | 6   | 6     | 6     | 7     | 6     | 6     | 6     | 6    |

|                                        |      |      |      |      |      |      |      |      |      |      |      |      |      |      |      |      |      |      |      |      |      |
|----------------------------------------|------|------|------|------|------|------|------|------|------|------|------|------|------|------|------|------|------|------|------|------|------|
| C24:1n9                                | 5    | 5    | 5    | 4    | 5    | 6    | 5    | 4    | 6    | 4    | 5    | 4    | 5    | 5    | 5    | 5    | 4    | 4    | 5    | 5    | 5    |
| C22:6n3                                | 6    | 5    | 5    | 7    | 5    | 5    | 6    | 6    | 4    | 5    | 5    | 5    | 6    | 6    | 6    | 5    | 5    | 5    | 6    | 5    | 5    |
| Total<br>( $\mu\text{g} / \text{mL}$ ) | 2734 | 1984 | 1974 | 2022 | 2304 | 2202 | 1978 | 2559 | 2335 | 2697 | 2548 | 2126 | 2614 | 3109 | 2251 | 2159 | 2133 | 2341 | 2734 | 2644 | 3675 |

**Table S4. Parameters in regression equation of rheological properties**

|           |           | CK                              | N-N                     | N-M                      | N-E                     | E-N                     | E-M                     | E-E                      |
|-----------|-----------|---------------------------------|-------------------------|--------------------------|-------------------------|-------------------------|-------------------------|--------------------------|
| Equation  |           | y = Intercept + B1*x^1 + B2*x^2 |                         |                          |                         |                         |                         |                          |
| Figure A1 | Intercept | 169.53478 $\pm$ 15.37054        | 85.6455 $\pm$ 9.74121   | 105.41033 $\pm$ 15.80458 | 85.6435 $\pm$ 19.49317  | 73.55017 $\pm$ 10.09675 | 72.74033 $\pm$ 17.49276 | 78.747 $\pm$ 10.42204    |
|           | B1        | -3.68436 $\pm$ 6.41939          | -6.39581 $\pm$ 4.06834  | -6.66286 $\pm$ 6.60066   | -16.90036 $\pm$ 8.14117 | -4.2799 $\pm$ 4.21683   | -11.89786 $\pm$ 7.30572 | -5.76392 $\pm$ 4.35268   |
|           | B2        | 1.59851 $\pm$ 0.56873           | 1.23458 $\pm$ 0.36044   | 1.73417 $\pm$ 0.58479    | 2.27458 $\pm$ 0.72128   | 1.32473 $\pm$ 0.3736    | 1.6528 $\pm$ 0.64726    | 1.15402 $\pm$ 0.38563    |
|           | RSS       | 1195.50016                      | 480.17196               | 1263.97156               | 1922.80932              | 515.86313               | 1548.41737              | 549.63788                |
|           | COD       | 0.93532                         | 0.91338                 | 0.91879                  | 0.80951                 | 0.94933                 | 0.75216                 | 0.89461                  |
|           | Adjusted  | 0.91684                         | 0.88863                 | 0.89558                  | 0.75509                 | 0.93486                 | 0.68134                 | 0.86449                  |
| Figure B1 | Intercept | 169.53478 $\pm$ 15.37054        | 79.869 $\pm$ 24.37425   | 93.684 $\pm$ 25.02421    | 95.683 $\pm$ 19.91358   | 107.982 $\pm$ 13.76328  | 87.81033 $\pm$ 18.02459 | 87.6335 $\pm$ 9.75092    |
|           | B1        | -3.68436 $\pm$ 6.41939          | -17.3625 $\pm$ 10.17971 | -13.58482 $\pm$ 10.45116 | -15.96671 $\pm$ 8.31675 | -6.16603 $\pm$ 5.74813  | -12.18014 $\pm$ 7.52783 | -8.09127 $\pm$ 4.07239   |
|           | B2        | 1.59851 $\pm$ 0.56873           | 2.17023 $\pm$ 0.90188   | 2.18409 $\pm$ 0.92593    | 2.23371 $\pm$ 0.73683   | 1.51621 $\pm$ 0.50926   | 1.7878 $\pm$ 0.66694    | 1.57095 $\pm$ 0.3608     |
|           | RSS       | 1195.50016                      | 3006.30921              | 3168.77881               | 2006.64176              | 958.55115               | 1644.00137              | 481.12983                |
|           | COD       | 0.93532                         | 0.66558                 | 0.78414                  | 0.81331                 | 0.91509                 | 0.79333                 | 0.94502                  |
|           | Adjusted  | 0.91684                         | 0.57003                 | 0.72247                  | 0.75997                 | 0.89083                 | 0.73428                 | 0.92931                  |
| Figure C1 | Intercept | 169.53478 $\pm$ 15.37054        | 69.6385 $\pm$ 17.83345  | 88.04318 $\pm$ 10.96942  | 94.04848 $\pm$ 20.58067 | 105.19123 $\pm$ 13.1733 | 81.8509 $\pm$ 16.05276  | 105.62457 $\pm$ 13.36182 |
|           | B1        | -3.68436 $\pm$ 6.41939          | -11.83377 $\pm$ 7.448   | -9.71794 $\pm$ 4.58129   | -11.77255 $\pm$ 8.59536 | -4.82014 $\pm$ 5.50173  | -3.17554 $\pm$ 6.70431  | -3.32468 $\pm$ 5.58046   |
|           | B2        | 1.59851 $\pm$ 0.56873           | 1.76663 $\pm$ 0.65987   | 1.44842 $\pm$ 0.40589    | 1.76473 $\pm$ 0.76152   | 1.80016 $\pm$ 0.48743   | 1.09017 $\pm$ 0.59398   | 1.67137 $\pm$ 0.49441    |
|           | RSS       | 1195.50016                      | 1609.3191               | 608.88924                | 2143.33643              | 878.13371               | 1303.97917              | 903.44629                |
|           | COD       | 0.93532                         | 0.79937                 | 0.87581                  | 0.75085                 | 0.95839                 | 0.84372                 | 0.95716                  |
|           | Adjusted  | 0.91684                         | 0.74205                 | 0.84033                  | 0.67966                 | 0.94651                 | 0.79907                 | 0.94492                  |

|           |           |                    |                    |                   |                    |                    |                    |                    |
|-----------|-----------|--------------------|--------------------|-------------------|--------------------|--------------------|--------------------|--------------------|
| Figure A2 | Intercept | 43.37009 ± 2.34484 | 23.28233 ± 1.55085 | 33.1805 ± 2.26491 | 27.608 ± 1.64126   | 22.21133 ± 2.02688 | 23.555 ± 2.057     | 21.05417 ± 1.73621 |
|           | B1        | -0.10432 ± 0.9793  | -0.10865 ± 0.6477  | 0.13393 ± 0.94592 | -0.67697 ± 0.68546 | -2.88779 ± 0.84651 | -0.76538 ± 0.85909 | 0.41689 ± 0.72512  |
|           | B2        | 0.30643 ± 0.08676  | 0.20159 ± 0.05738  | 0.25966 ± 0.08381 | 0.25424 ± 0.06073  | 0.48682 ± 0.075    | 0.22129 ± 0.07611  | 0.10686 ± 0.06424  |
|           | RSS       | 27.82263           | 12.17064           | 25.95823          | 13.6309            | 20.78865           | 21.4112            | 15.25378           |
|           | COD       | 0.97095            | 0.96961            | 0.96752           | 0.96742            | 0.96792            | 0.92271            | 0.93381            |
|           | Adjusted  | 0.96265            | 0.96093            | 0.95824           | 0.95812            | 0.95876            | 0.90062            | 0.9149             |
| Figure B2 | Intercept | 43.37009 ± 2.34484 | 28.29717 ± 2.39235 | 35.08267 ± 2.7502 | 26.25383 ± 2.55963 | 26.05833 ± 1.78378 | 25.9445 ± 1.93035  | 23.775 ± 2.48222   |
|           | B1        | -0.10432 ± 0.9793  | -1.74901 ± 0.99915 | -0.87242 ± 1.1486 | 0.20111 ± 1.06901  | -0.22041 ± 0.74498 | -1.31255 ± 0.8062  | 0.39062 ± 1.03668  |
|           | B2        | 0.30643 ± 0.08676  | 0.30466 ± 0.08852  | 0.30667 ± 0.10176 | 0.19314 ± 0.09471  | 0.23189 ± 0.066    | 0.30269 ± 0.07143  | 0.16674 ± 0.09185  |
|           | RSS       | 27.82263           | 28.96153           | 38.27356          | 33.15314           | 16.10098           | 18.85574           | 31.17832           |
|           | COD       | 0.97095            | 0.90005            | 0.93663           | 0.93357            | 0.96731            | 0.9532             | 0.93136            |
|           | Adjusted  | 0.96265            | 0.87149            | 0.91852           | 0.91459            | 0.95797            | 0.93982            | 0.91174            |
| Figure C2 | Intercept | 43.37009 ± 2.34484 | 42.2995 ± 2.57774  | 29.25487 ± 2.8881 | 27.47583 ± 2.39551 | 18.48233 ± 1.4325  | 29.25487 ± 2.8881  | 25.9615 ± 3.99027  |
|           | B1        | -0.10432 ± 0.9793  | -2.04323 ± 1.07657 | 0.67222 ± 1.20619 | -0.01361 ± 1.00047 | 4.75056 ± 0.59827  | 0.67222 ± 1.20619  | 0.55295 ± 1.66651  |
|           | B2        | 0.30643 ± 0.08676  | 0.15746 ± 0.09538  | 0.09432 ± 0.10686 | 0.21042 ± 0.08864  | -0.20144 ± 0.053   | 0.09432 ± 0.10686  | 0.20837 ± 0.14765  |
|           | RSS       | 27.82263           | 33.62398           | 42.20794          | 29.03799           | 10.38386           | 42.20794           | 80.57056           |
|           | COD       | 0.97095            | 0.38533            | 0.85348           | 0.94064            | 0.98152            | 0.85348            | 0.89553            |
|           | Adjusted  | 0.96265            | 0.20971            | 0.81161           | 0.92368            | 0.97624            | 0.81161            | 0.86569            |
